# Supplementary material for: Antimicrobial and antioxidant potential from Piper marginatum roots
Source: PeerJ journal article supplement (doi:10.7717/peerj-ochem.8), 2023-06-22
Supplement: Raw_Data.xls [file Raw_Data.xls]

## Sheet: Phenolic
	Gallic acid 1ug/ml	Gallic acid 2,5ug/ml	Gallic acid 5ug/ml	Gallic acid 7,5ug/ml	Gallic acid 10ug/ml	Gallic acid 12,5ug/ml	Gallic acid 15ug/ml	Gallic acid 20ug/ml
	0.104	0.124	0.253	0.318	0.488	0.544	0.626	0.712
	0.113	0.137	0.234	0.324	0.455	0.538	0.622	0.707
	0.098	0.147	0.232	0.333	0.416	0.524	0.637	0.727
Average	0.105	0.136	0.239667	0.325	0.453	0.535333	0.628333	0.715333
Concentration	ABS
1	0.105
2.5	0.136
5	0.23967
7.5	0.325
10	0.453
12.5	0.53533
15	0.62833
					Gallic acid y=0,0386x+0,0508
Roots
	Extract
	0.224	0.21	0.213
	0.224	0.21	0.213
	0.224	0.21	0.213
Average	0.224	0.21	0.213
Average/sample	0.224	0.21	0.213
Equivalent	4.48705	4.12435	4.20207
	44.8705	41.2435	42.0207
mg Gallic acid/g extract

## Sheet: ABTS
	ABTS	Trolox 0.5	Trolox 0.5	Trolox 0.5	Trolox 1	Trolox 1	Trolox 1	Trolox 2	Trolox 2	Trolox 2	Trolox 3	Trolox 3	Trolox 3	Trolox 4	Trolox 4	Trolox 4	Trolox 5	Trolox 5	Trolox 5
	0.695	0.661	0.637	0.654	0.582	0.592	0.59	0.495	0.49	0.482	0.381	0.383	0.376	0.275	0.289	0.286	0.166	0.166	0.155
	0.695	0.661	0.637	0.654	0.582	0.592	0.59	0.495	0.49	0.482	0.381	0.383	0.376	0.275	0.289	0.286	0.166	0.166	0.155
	0.695	0.661	0.637	0.654	0.582	0.592	0.59	0.495	0.49	0.482	0.381	0.383	0.376	0.275	0.289	0.286	0.166	0.166	0.155
Average	0.695	0.661	0.637	0.654	0.582	0.592	0.59	0.495	0.49	0.482	0.381	0.383	0.376	0.275	0.289	0.286	0.166	0.166	0.155
% Activity		4.89209	8.34532	5.89928	16.259	14.8201	15.1079	28.777	29.4964	30.6475	45.1799	44.8921	45.8993	60.4317	58.4173	58.8489	76.1151	76.1151	77.6978
Root	ABTS	Extract 5	Extract 5	Extract 5	Extract 10	Extract 10	Extract 10	Extract 20	Extract 20	Extract 20	Extract 40	Extract 40	Extract 40	Extract 60	Extract 60	Extract 60	Extract 80	Extract80	Extract 80	Extract 100	Extract 100	Extract 100
	0.58	0.563	0.524	0.551	0.501	0.505	0.495	0.433	0.428	0.418	0.337	0.317	0.343	0.227	0.204	0.201	0.145	0.133	0.13	0.101	0.095	0.099
	0.588	0.563	0.524	0.551	0.501	0.505	0.495	0.433	0.428	0.418	0.337	0.317	0.343	0.227	0.204	0.201	0.145	0.133	0.13	0.101	0.095	0.099
	0.594	0.563	0.524	0.551	0.501	0.505	0.495	0.433	0.428	0.418	0.337	0.317	0.343	0.227	0.204	0.201	0.145	0.133	0.13	0.101	0.095	0.099
media	0.587333	0.563	0.524	0.551	0.501	0.505	0.495	0.433	0.428	0.418	0.337	0.317	0.343	0.227	0.204	0.201	0.145	0.133	0.13	0.101	0.095	0.099
% Atividade		4.14302	10.7832	6.18615	14.6992	14.0182	15.7208	26.277	27.1283	28.8309	42.622	46.0272	41.6005	61.3507	65.2667	65.7775	75.3121	77.3553	77.8661	82.8036	83.8252	83.1442
Samples	ABTS	Samples	Samples	Samples	Samples	Samples	Samples	Samples	Samples	Samples	Samples	Samples	Samples	Samples	Samples	Samples
	0.58	0.464	0.45	0.441	0.369	0.355	0.352	0.295	0.273	0.281	0.167	0.165	0.176	0.068	0.075	0.079
	0.588	0.464	0.45	0.441	0.369	0.355	0.352	0.295	0.273	0.281	0.167	0.165	0.176	0.068	0.075	0.079
	0.594	0.464	0.45	0.441	0.369	0.355	0.352	0.295	0.273	0.281	0.167	0.165	0.176	0.068	0.075	0.079
Average	0.587333	0.464	0.45	0.441	0.369	0.355	0.352	0.295	0.273	0.281	0.167	0.165	0.176	0.068	0.075	0.079
% Activity		20.9989	23.3825	24.9149	37.1737	39.5573	40.0681	49.773	53.5187	52.1566	71.5664	71.9069	70.0341	88.4222	87.2304	86.5494
