# Supplementary material for: Antimicrobial and antioxidant potential from Piper marginatum roots
Source: PeerJ journal article supplement (doi:10.7717/peerj-ochem.8), 2023-06-22
Supplement: Supplemental_Files.docx [file Supplemental_Files.docx]

Supplemental Files

Figure S1: 1H NMR spectrum of (*E,E*)-*N*-Isobutyl -2,4-octadienamide

Figure S2: 13C NMR spectrum of (*E,E*)-*N*-Isobutyl -2,4-octadienamide


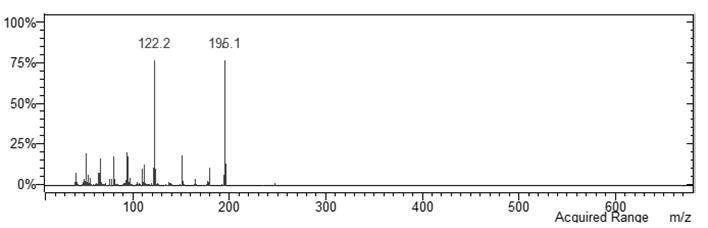


Figure S3: Mass spectrum of (*E,E*)-*N*-Isobutyl -2,4-octadienamide

Figure S4: IR spectrum of (*E,E*)-*N*-Isobutyl -2,4-octadienamide


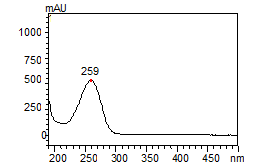


Figure S5: UV spectrum of (*E,E*)-*N*-Isobutyl -2,4-octadienamide

Figure S6: 1H NMR spectrum of (*E,E*)-*N*-Isobutyl -2,4-decadienamide

**
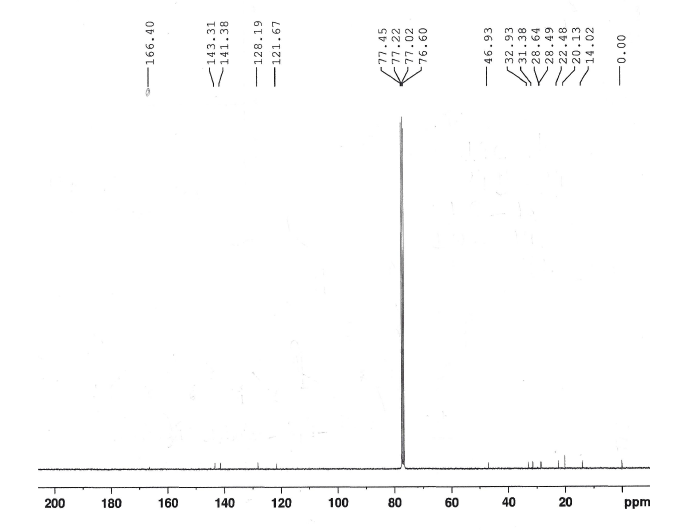
**

Figure S7: 13C NMR spectrum of (*E,E*)-*N*-Isobutyl -2,4-decadienamide


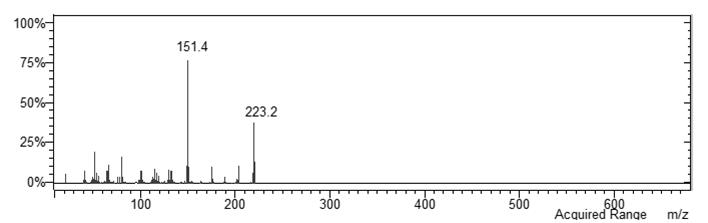


Figure S8: Mass spectrum of (*E,E*)-*N*-Isobutyl -2,4-decadienamide


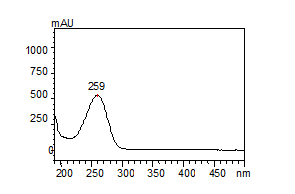


Figure S9: UV spectrum of (*E,E*)-*N*-Isobutyl -2,4-decadienamide
